# Supplementary material for: Inhibition of a multiproduct terpene synthase from Medicago truncatula by 3-bromoprenyl diphosphates
Source: Royal Society of Chemistry journal article supplement (doi:10.1039/c5ob00506j), 2015-01-01

## Supporting Information

# Inhibition of a Multiproduct Terpene Synthase from *Medicago truncatula* by 3-Bromoprenyl diphosphates

Abith Vattekkatte<sup>a</sup>, Nathalie Gatto<sup>a</sup>, Eva Schulze<sup>b</sup>, Wolfgang Brandt<sup>b</sup> and Wilhelm Boland<sup>a\*</sup>

<sup>a</sup>Department of Bioorganic Chemistry, Max Planck Institute for Chemical Ecology,  
Hans-Knöll-Strasse 8, 07745 Jena, Germany

<sup>b</sup> Department of Bioorganic Chemistry, Leibniz Institute of Plant Biochemistry,  
Weinberg 3, 06120 Halle (Saale), Germany.

[boland@ice.mpg.de](mailto:boland@ice.mpg.de)

**Table of contents***<sup>1</sup>H, <sup>13</sup>C spectra of the synthetic compounds*

2-((7-methyloct-6-en-2-yn-1-yl)oxy)tetrahydro-2H-pyran (**2a**)

7-methyloct-6-en-2-yn-1-ol (**3a**)

(2*E*)-3-bromo-7-methylocta-2,6-dien-1-ol (**4a**)

Trisammonium (2*E*)-1-(3-bromo-7-methylocta-2,6-dienyl)diphosphate(**5a**)

*<sup>31</sup>P NMR spectra of the synthetic compounds*

Trisammonium (2*E*)-1-(3-bromo-7-methylocta-2,6-dienyl)diphosphate(**5a**)

Trisammonium ((2*E*,6*E*)-3-bromo-7,11-dimethyldodeca-2,6,10-trienyl)diphosphate (**5b**)

*IR spectra of the synthetic compounds*

Trisammonium (2*E*)-1-(3-bromo-7-methylocta-2,6-dienyl)diphosphate(**5a**)

Trisammonium ((2*E*,6*E*)-3-bromo-7,11-dimethyldodeca-2,6,10-trienyl)diphosphate (**5b**)

# $^1\text{H}$ , $^{13}\text{C}$ spectra of the synthetic compounds

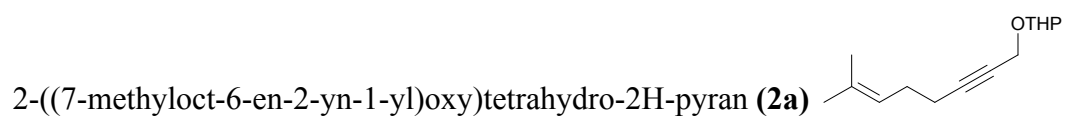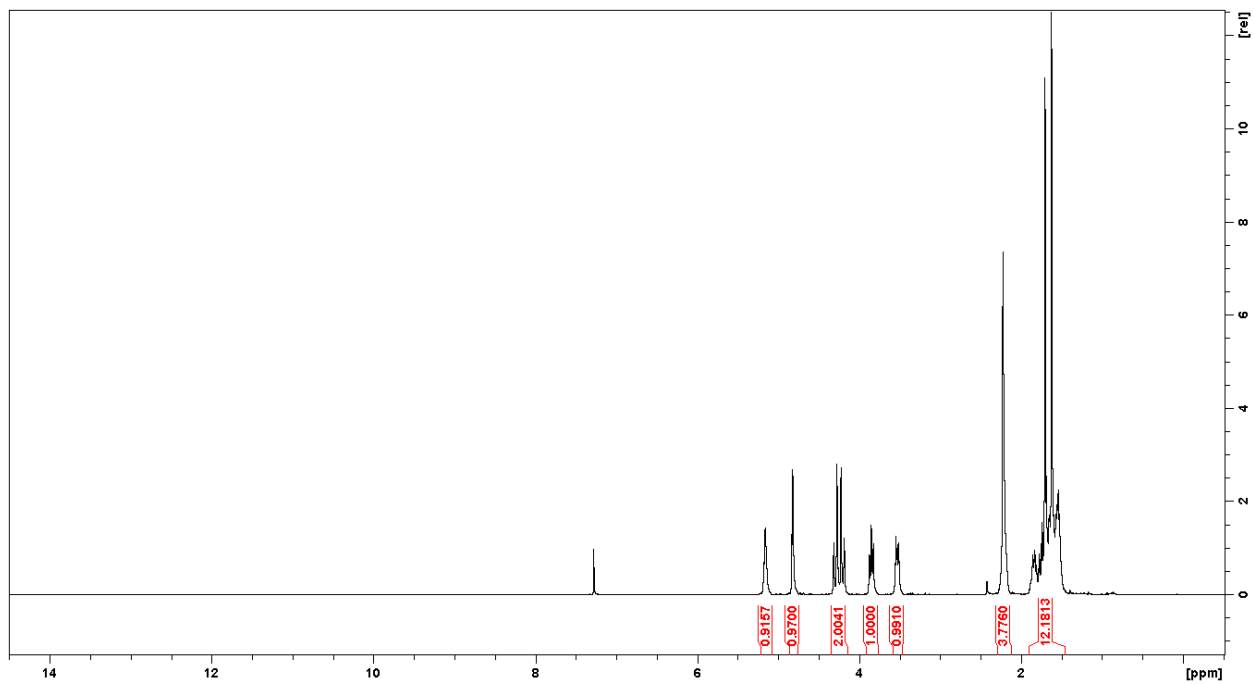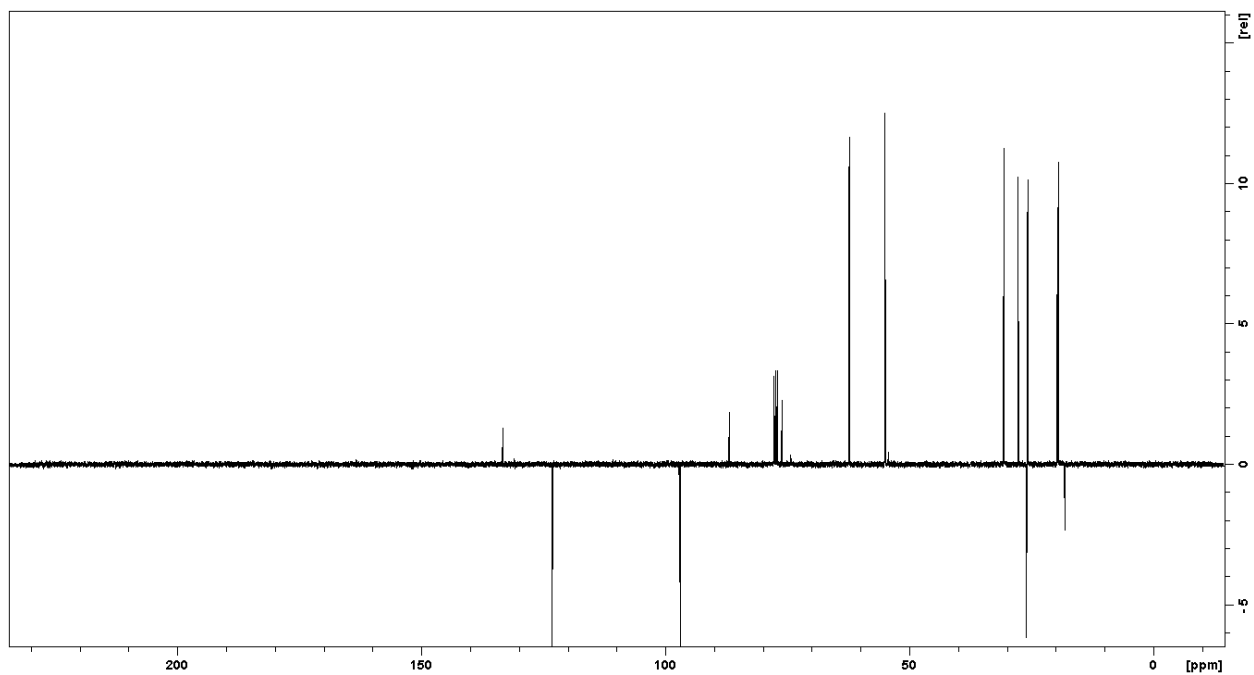

7-methyloct-6-en-2-yn-1-ol (**3a**)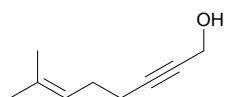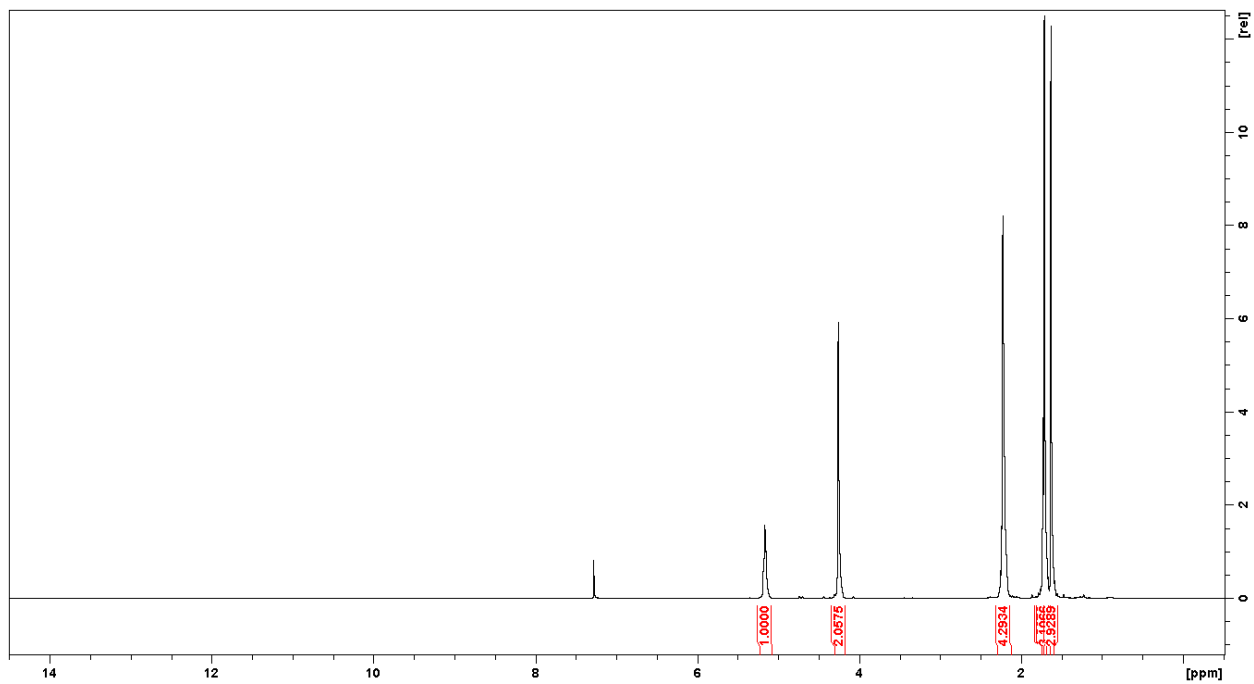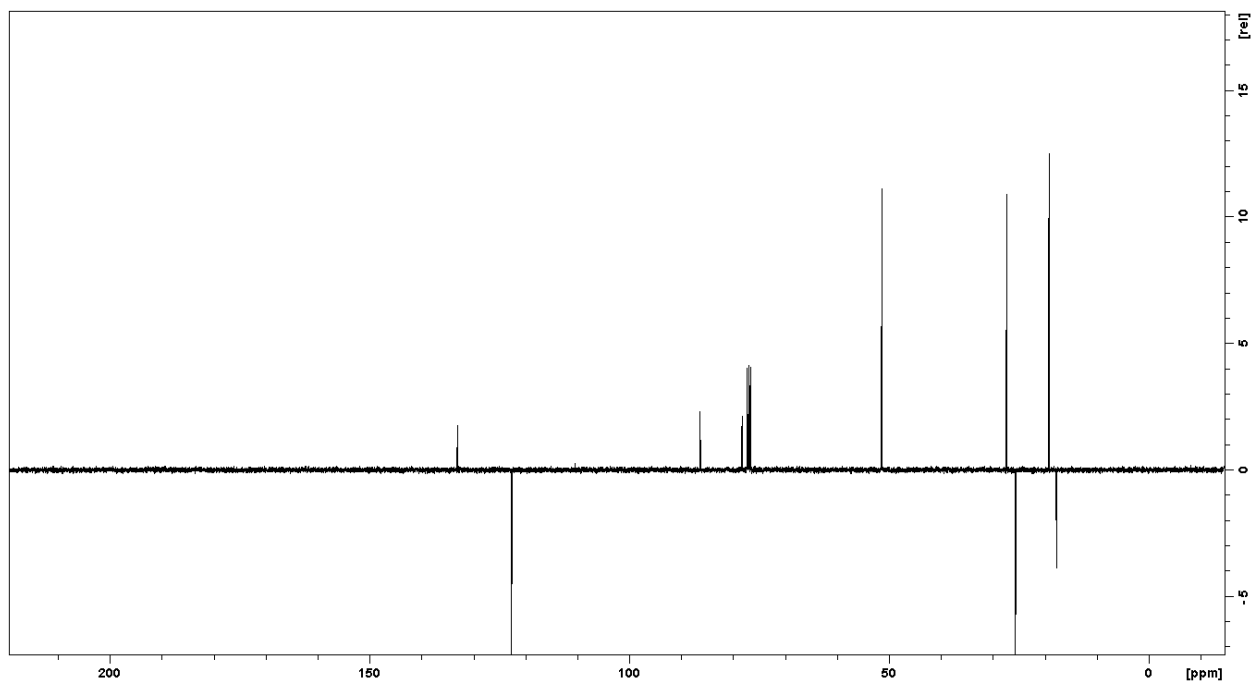

(2E)-3-bromo-7-methylocta-2,6-dien-1-ol (**4a**)

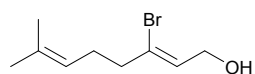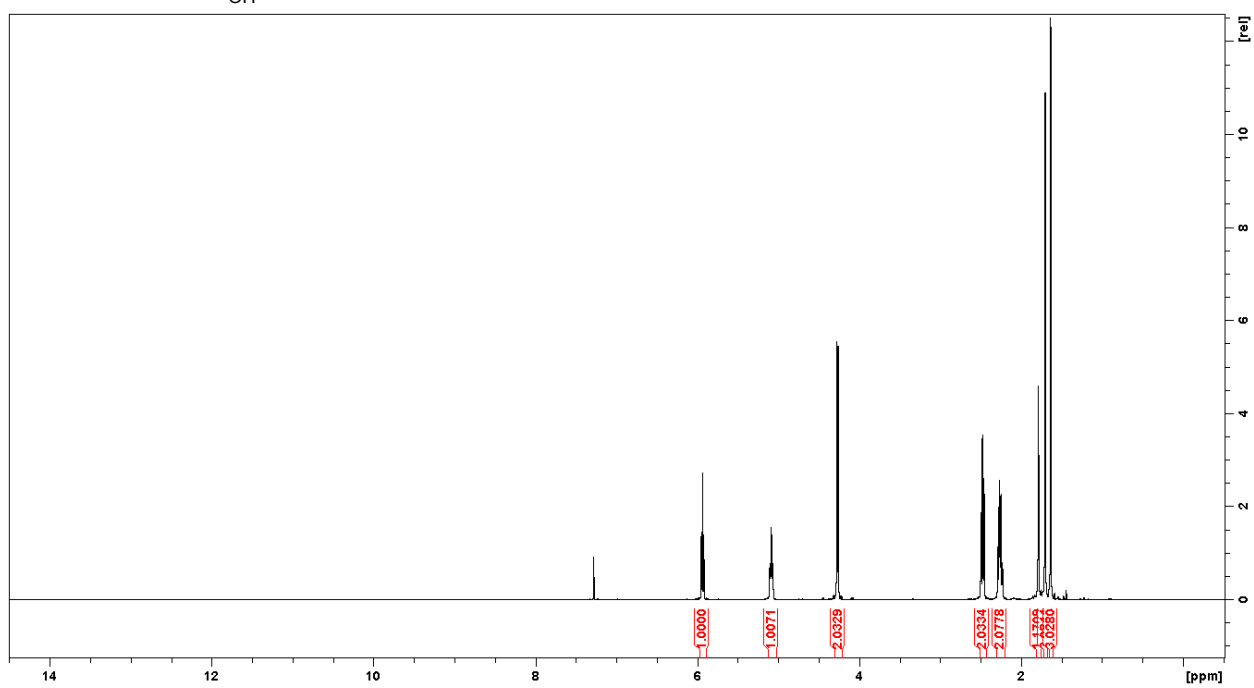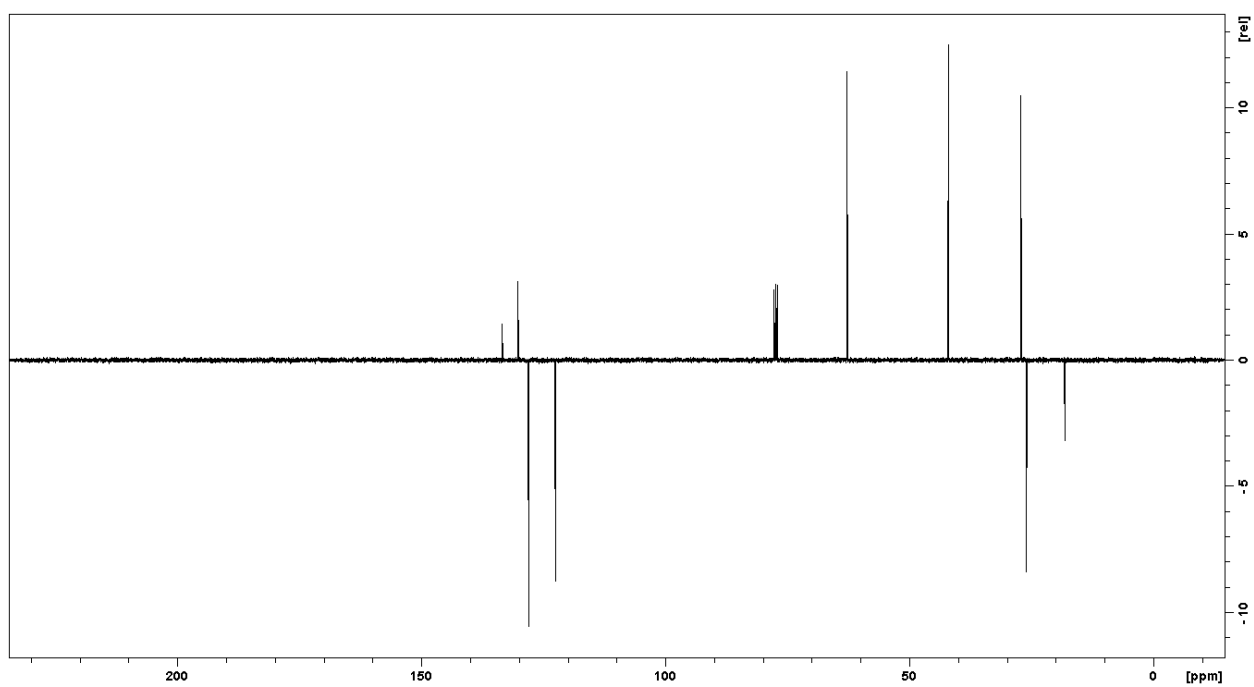

Trisammonium (2*E*)-1-(3-bromo-7-methylocta-2,6-dienyl)diphosphate(**5a**)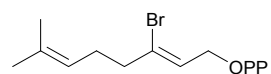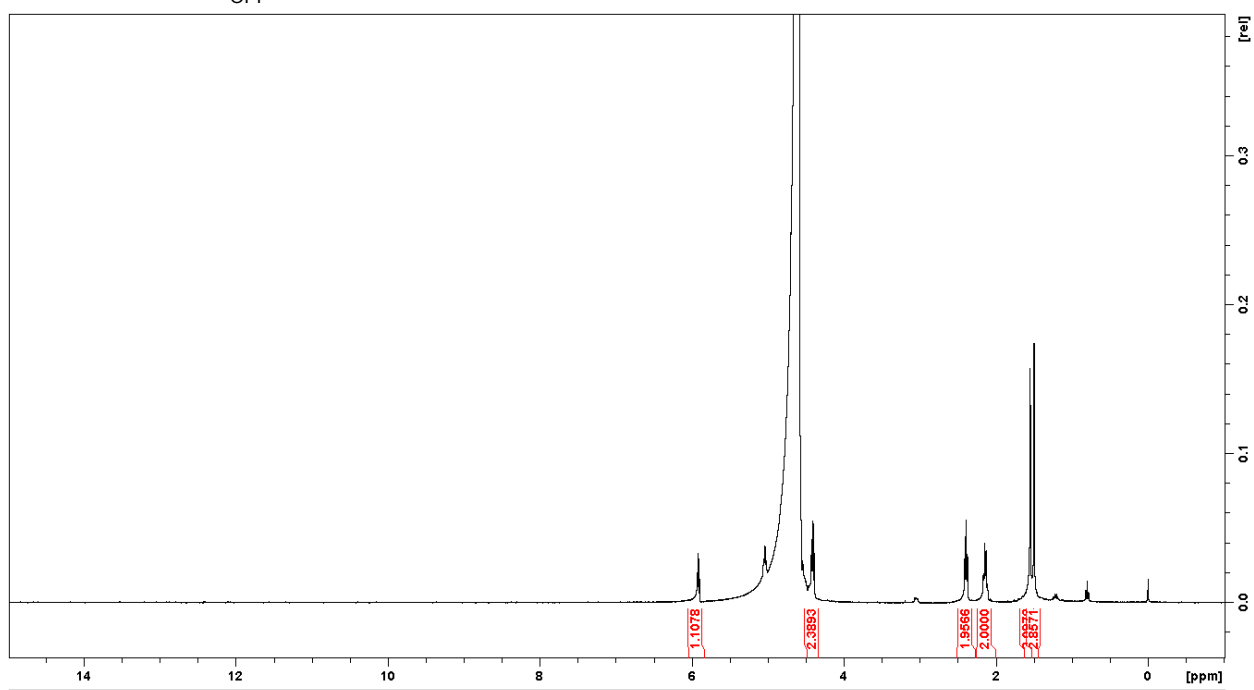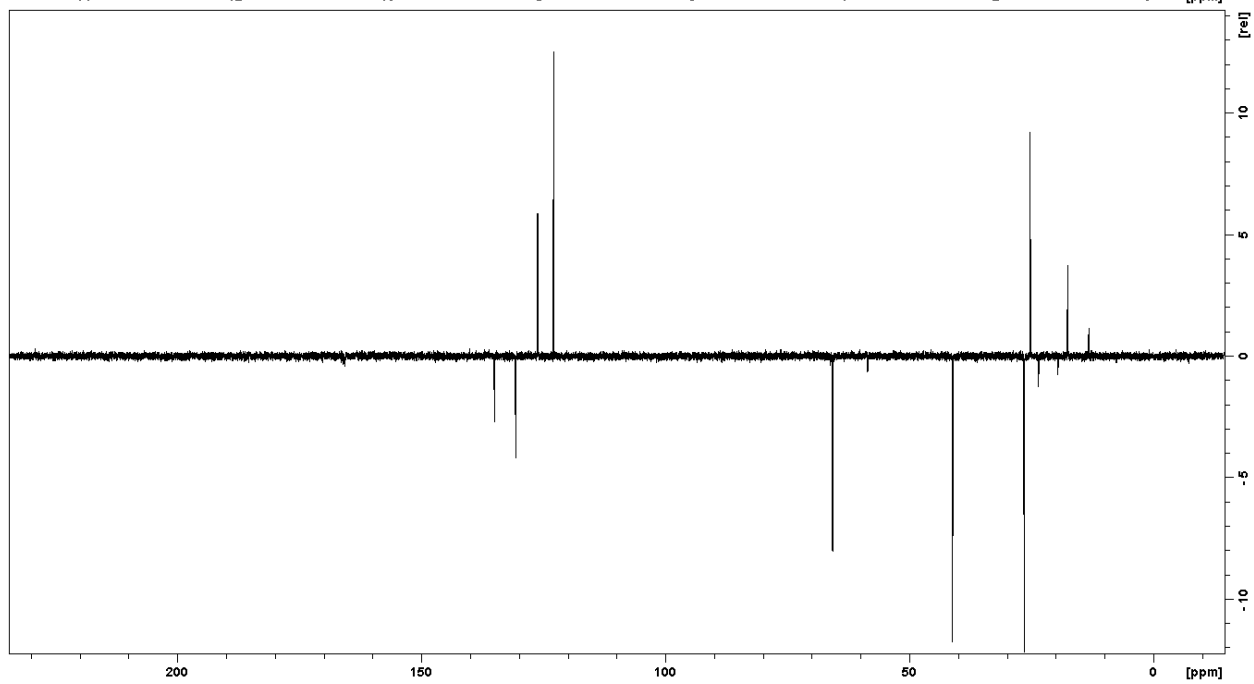

## $^{31}\text{P}$ NMR and IR spectra spectra of the synthetic compounds

Trisammonium (2*E*)-1-(3-bromo-7-methylocta-2,6-dienyl)diphosphate(**5a**)

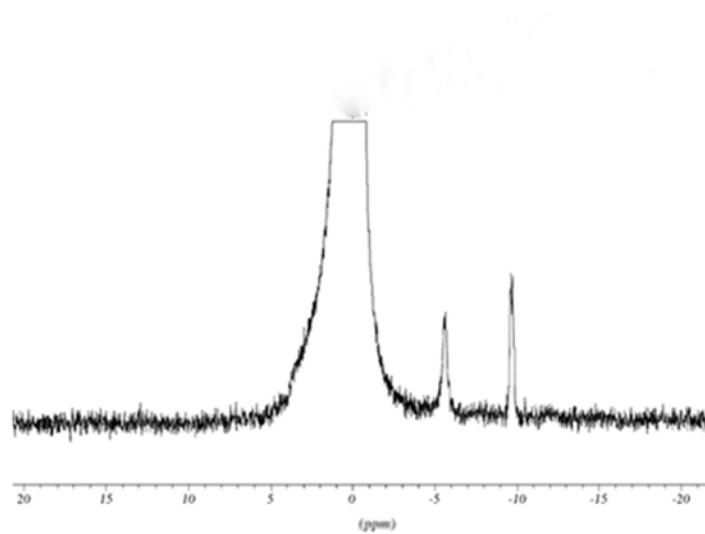

Trisammonium (2*E*)-1-(3-bromo-7-methylocta-2,6-dienyl)diphosphate(**5a**)

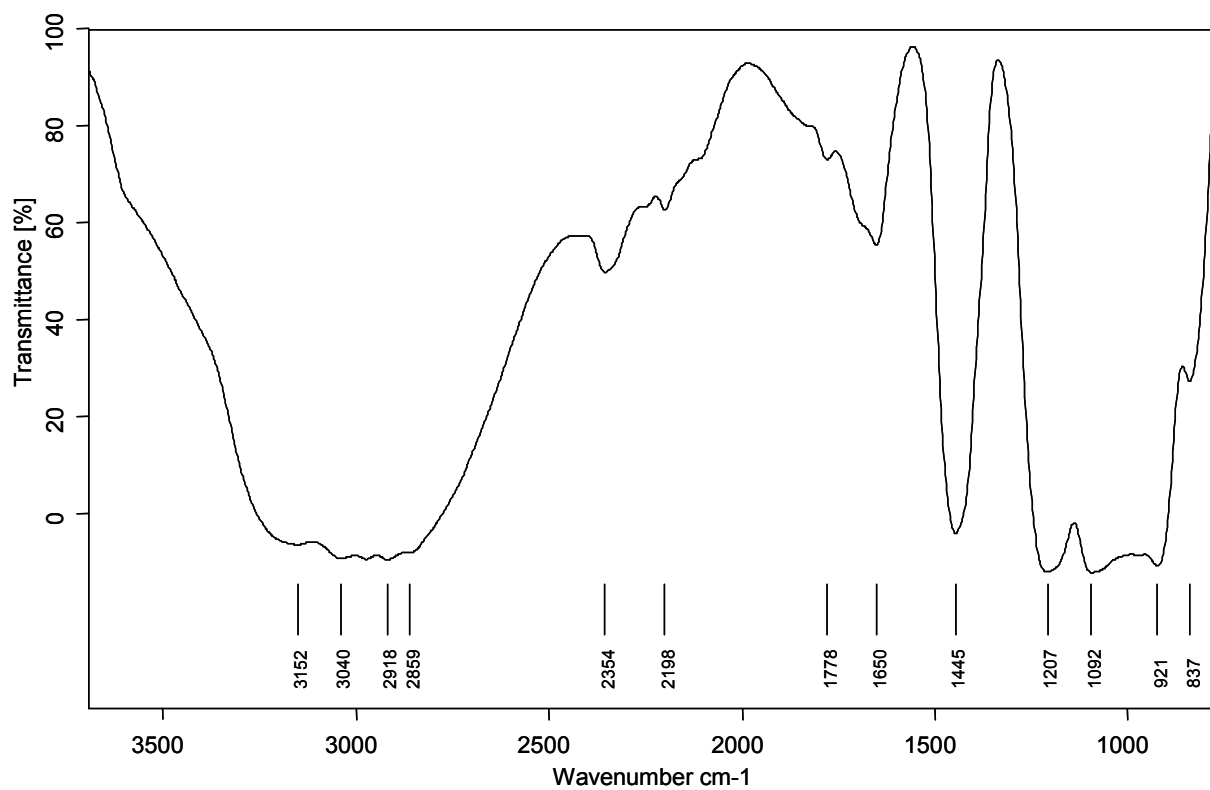

Trisammonium ((2*E*,6*E*)-3-bromo-7,11-dimethyldodeca-2,6,10-trienyl)diphosphate (**5b**)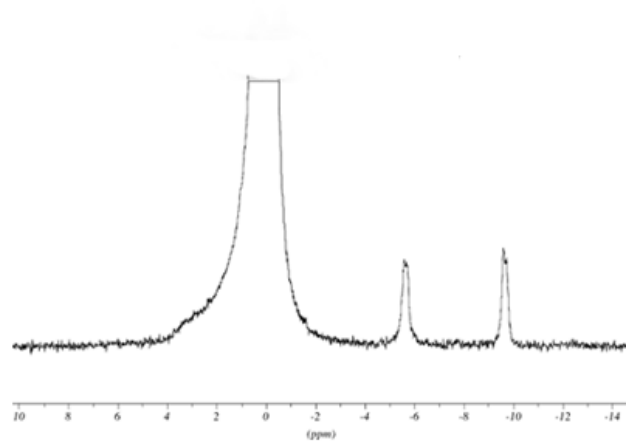Trisammonium ((2*E*,6*E*)-3-bromo-7,11-dimethyldodeca-2,6,10-trienyl)diphosphate (**5b**)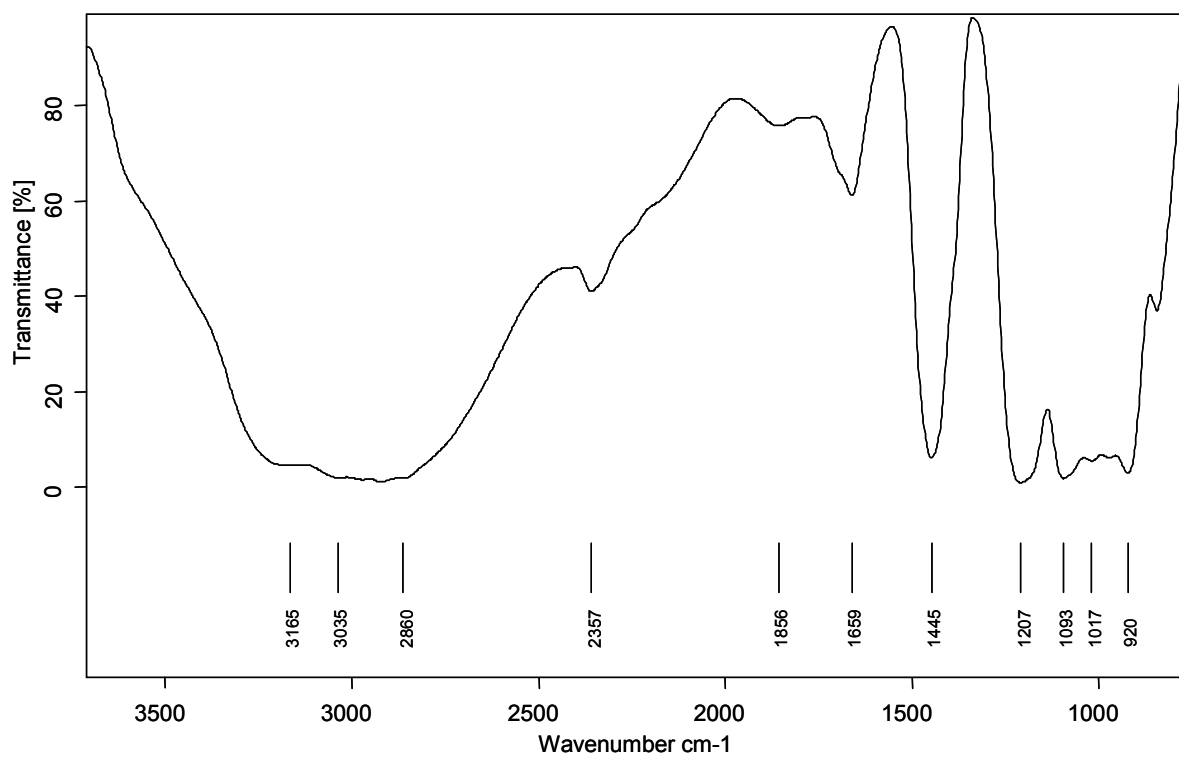

Supplement: c5ob00506j1.pdf [file c5ob00506j1.pdf]
